# Supplementary material for: High COVID-19 vaccine uptake among HIV-positive smokers in Japan: effects of the health belief model - a single-center survey
Source: Research Square preprint supplement (doi:10.21203/rs.3.rs-7695970/v1), 2025-11-10
Supplement: Supplementary file 1 [file 30bee6113a6fac8ff2e2a685.docx]

**<Questionnaire>**

Please circle the number of the answer that applies best, or fill in the blank spaces with the appropriate number or text.

**[1] Please fill in today’s date.**
Year (CE): ______ Month: ______ Day: ______

**[2] Who is filling out this form?**

1. Self  2. Parent/Guardian  3. Other (__________)

**[3] Please provide your date of birth, age, and gender.**
Date of birth: Year (CE) ______ Month ______ Day ______
Age: ______ years
Gender: 1. Male  2. Female  3. Prefer not to answer

**[4] Please provide your current weight and height.**
If you do not know exactly, please provide approximate values.
Current height: ______ cm  Current weight: ______ kg

**[5] Please indicate your place of residence.**
________ Prefecture

**[6] Please provide your occupation.**

**[7] Please list any illnesses you have had.**
Diagnosis: __________ Treatment: None / Ongoing / Completed, Hospitalization: Yes / No
Diagnosis: __________ Treatment: None / Ongoing / Completed, Hospitalization: Yes / No
Diagnosis: __________ Treatment: None / Ongoing / Completed, Hospitalization: Yes / No
Diagnosis: __________ Treatment: None / Ongoing / Completed, Hospitalization: Yes / No

If you have had any other illnesses, please provide a description in the blank space below.

**[8] Please list any illnesses among your blood relatives.**
Diagnosis: __________ Relationship to you: __________
Diagnosis: __________ Relationship to you: __________
Diagnosis: __________ Relationship to you: __________
Diagnosis: __________ Relationship to you: __________

If you have had any other illnesses, please provide a description in the blank space below.

**[9] Please provide information about your lifestyle habits.**
Smoking: age from ___ to ___   ___ cigarettes per day
Alcohol: Beer / Shochu / Other   Weekly / Daily   Amount: __________

**[10] Allergies:**
Food: __________ 　　　 Symptoms: __________
Medications: __________ 　 Symptoms: __________
Other: __________ 　　　 Symptoms: __________

**[11] Please list any current medications you are using (including eye drops and inhalers).**

**[12] Please provide information about your HIV status (to the best of your knowledge).**
Date diagnosed: Year (CE) ______ Month ______ Day ______

**[13] Please provide the following information about COVID-19 infection.**
Date diagnosed: Year (CE) ______ Month ______ Day ______

Were you hospitalized as a result of COVID-19?

1. No
2. Yes → Reason for hospitalization:
    a. Pneumonia b. Other (__________)

Name of hospital:

1. Tokyo Women’s Medical University Hospital
2. Other (Hospital name: __________)

Date of hospitalization: Year (CE) ______ Month ______ Day ______
Date of discharge: Year (CE) ______ Month ______ Day ______

**Symptoms at the time of diagnosis:**
Fever (started ___ days before hospitalization)
Cough (started ___ days before hospitalization)
Fatigue (started ___ days before hospitalization)
Shortness of breath (started ___ days before hospitalization)
Loss of taste (started ___ days before hospitalization)
Loss of smell (started ___ days before hospitalization)
Headache (started ___ days before hospitalization)
Vomiting/diarrhea (started ___ days before hospitalization)

**Contact history before diagnosis:**

1. Had contact with a diagnosed person / suspected contact
2. No contact
3. Unknown

If you selected “Had contact,” please specify who:
Family / Work colleague / Part-time work colleague / Other (______)

Do you currently live with anyone?

1. Yes (Family / Partner / Friend / Other (______))
2. No

**Post-COVID-19 symptoms:**

1. Please circle one:
    　　　- Symptoms persisted after treatment (discharge) / New symptoms appeared
    　　　- No treatment received, but symptoms persisted / New symptoms appeared
2. Please describe your current symptoms (e.g., fatigue, insomnia):
3. Which of the symptoms described in “2” above began after COVID-19 infection?
4. Which of the symptoms described in “2” above worsened after COVID-19

infection?

1. After infection, have you experienced any of the following? (Check all that apply):

5-1 Have you often felt depressed, sad, or hopeless in recent months?

5-2 Have you lost interest in activities you used to enjoy?

1. Please check any impacts before or after COVID-19 infection (Check all that

apply):

6-1 Impact on HIV treatment:

6-1-1 Reduced/stopped/postponed outpatient visits

6-1-2 Increased telephone follow-ups

6-1-3 Received medications by mail

6-1-4 Could not pick up medication from the pharmacy

6-2 Other impacts (please describe below):

**[14] Vaccination status:**

**COVID-19 vaccine:**
Q1. Please provide information about your COVID-19 vaccination history between January 1, 2019, and the date this questionnaire is administered.

Between January 1, 2019, and today, have you received the COVID-19 vaccine?

1. No
2. Yes, once only
3. Yes, twice

If vaccinated, please provide the approximate date(s):
1st dose: Year (　) Month (　) Day (　)
2nd dose: Year (　) Month (　) Day (　)

- If the exact date is unknown, please provide an approximate period, such as “around mid-October”.

If you did not receive any or only one dose, please indicate the reason.

1. Could not receive because of illness/allergy/etc.
2. Contracted influenza before vaccination
3. Did not want to be vaccinated
4. Other (__________)

Please provide information about the vaccine manufacturer (circle one).

1. Pfizer

2. Moderna

3. AstraZeneca

4. Johnson & Johnson

5. Other (______)

Please provide information about place of vaccination.

1. Hospital (regular / not regular)

2. Clinic (regular / not regular)

3. Workplace

4. Part-time workplace

5. Other (______) (e.g., overseas)

Q2. After COVID-19 vaccination, did you experience any of the following?

Fever (started ___ days after vaccination)
Cough (started ___ days after vaccination)
Fatigue (started ___ days after vaccination)
Shortness of breath (started ___ days after vaccination)
Loss of taste (started ___ days after vaccination)
Loss of smell (started ___ days after vaccination)
Headache (started ___ days after vaccination)
Vomiting/diarrhea (started ___ days after vaccination)
If you have had other symptoms (e.g., fatigue, insomnia), please describe in the blank space below.

After vaccination, did you have any sexual contact?

1. Yes

2. No

If yes, how many days after vaccination? (____ days)

**Influenza vaccine:**

Q1. Please provide information about your influenza vaccination history between January

1, 2019, and the date this questionnaire is administered.

Between January 1, 2019, and today, have you received the influenza vaccine?

1. No
2. Yes, once only
3. Yes, twice

If vaccinated, please provide the approximate date(s):
1st dose: Year (　) Month (　) Day (　)
2nd dose: Year (　) Month (　) Day (　)

- If the exact date is unknown, please provide an approximate period, such as “around mid-October”.

If you did not receive any or only one dose, please indicate the reason.

1. Could not receive because of illness/allergy/etc.
2. Contracted influenza before vaccination
3. Did not want to be vaccinated
4. Other (__________)

Q2. Between January 1, 2019, and today, did you contract influenza?
1. Contracted / believed to have contracted during the period

2. Did not contract / believed not to have contracted during the period

If you checked “(1) Contracted / believed to have contracted influenza” above, please also answer the following.

If contracted, please provide the approximate date(s):
Year (　) Month (　) Day (　)

Year (　) Month (　) Day (　)

- If the exact date is unknown, please provide an approximate period, such as “around mid-October”.

When you had influenza, did you experience any severe symptoms such as pneumonia or encephalopathy?

1. No severe symptoms

2. Severe symptoms were observed → Symptoms (　　　　　)

Were you hospitalized as a result of having influenza or associated symptoms?

1. No

2. Yes → What was the reason for your hospitalization?

a. Pneumonia b. Others (　　　　　)

**Pneumococcal vaccine:**
Q1. Between January 1, 2019, and today, have you received the pneumococcal vaccine?

1. No
2. Yes (1st dose / 2nd dose)

If vaccinated, please provide the approximate date(s):
1st dose: Year (　) Month (　) Day (　)
2nd dose: Year (　) Month (　) Day (　)

- If the exact date is unknown, please provide an approximate period, such as “around mid-October”.

If you did not receive any or only one dose, please indicate the reason.

1. Could not receive because of illness/allergy/etc.
2. Contracted pneumococcal infection before vaccination
3. Did not want to be vaccinated
4. Other (__________)

Q2. Between January 1, 2019, and today, did you contract pneumococcal infection?
1. Contracted / believed to have contracted during the period

2. Did not contract / believed not to have contracted during the period

If you checked “(1) Contracted / believed to have contracted pneumococcal infection” above, please also answer the following.

If contracted, please provide the approximate date(s):
Year (　) Month (　) Day (　)

Year (　) Month (　) Day (　)

- If the exact date is unknown, please provide an approximate period, such as “around mid-October”.

When you had pneumococcal infection, did you experience any severe symptoms such as pneumonia or encephalopathy?

1. No severe symptoms

2. Severe symptoms were observed → Symptoms (　　　　　)

Were you hospitalized as a result of having pneumococcal infection or associated symptoms?

1. No

2. Yes → What was the reason for your hospitalization?

a. Pneumonia b. Others (　　　　　)

**Other vaccines:**
For each, specify the year, month, and approximate day
Hepatitis A Year (CE): ______ Month: ______ Day: ______

Hepatitis B Year (CE): ______ Month: ______ Day: ______

Measles Year (CE): ______ Month: ______ Day: ______

Rubella Year (CE): ______ Month: ______ Day: ______

Mumps Year (CE): ______ Month: ______ Day: ______

Pertussis Year (CE): ______ Month: ______ Day: ______

Chickenpox Year (CE): ______ Month: ______ Day: ______

Shingles Year (CE): ______ Month: ______ Day: ______

Tetanus Year (CE): ______ Month: ______ Day: ______

HPV Year (CE): ______ Month: ______ Day: ______

Others Year (CE): ______ Month: ______ Day: ______

End of questionnaire.
Thank you for your cooperation.
